# Supplementary material for: Identification and Characterization of a Novel Gentisate 1,2-Dioxygenase Gene from a Halophilic Martelella Strain
Source: PubMed Central journal article supplement (PMC4585797; doi:10.1038/srep14307), 2015-09-23
Supplement: srep14307-s1.pdf [file srep14307-s1.pdf]

# 1 **Supplementary Information**

## 2 **Identification and Characterization of a Novel Gentisate**

### 3 **1,2-Dioxygenase Gene from a Halophilic *Marteella* Strain**

4

5 Ling Huang<sup>1</sup>, Haiyang Hu<sup>2</sup>, Hongzhi Tang<sup>2#</sup>, Yongdi Liu<sup>1</sup>, Ping Xu<sup>2</sup>, Jie Shi<sup>1</sup>, Kuangfei Lin<sup>1</sup>,  
6 Qishi Luo<sup>3</sup> and Changzheng Cui<sup>1#</sup>

7

8 <sup>1</sup> State Environmental Protection Key Laboratory of Environmental Risk Assessment and  
9 Control on Chemical Process, School of Resources and Environmental Engineering, East China  
10 University of Science and Technology, Shanghai 200237, China

11 <sup>2</sup> State Key Laboratory of Microbial Metabolism, and School of Life Sciences & Biotechnology,  
12 Shanghai Jiao Tong University, Shanghai 200240, People's Republic of China

13 <sup>3</sup> Shanghai Engineering Research Center of Contaminated Sites Remediation, Shanghai  
14 Institute for Design & Research in Environmental Engineering Co. Ltd., Shanghai 200232,  
15 People's Republic of China

16 #Address correspondence to, Hongzhi Tang, School of Life Sciences and Biotechnology,  
17 Shanghai Jiao Tong University, Shanghai 200240, PR China. Tel, +86-21-34206647;  
18 Fax, +86-21-34206647-801; E-mail, tanghongzhi@sjtu.edu.cn

19 #Address correspondence to, Changzheng Cui, State Environmental Protection Key Laboratory  
20 of Environmental Risk Assessment and Control on Chemical Process, School of Resources and  
21 Environmental Engineering, East China University of Science and Technology, Shanghai  
22 200237, China. E-mail, cuichangzheng@ecust.edu.cn

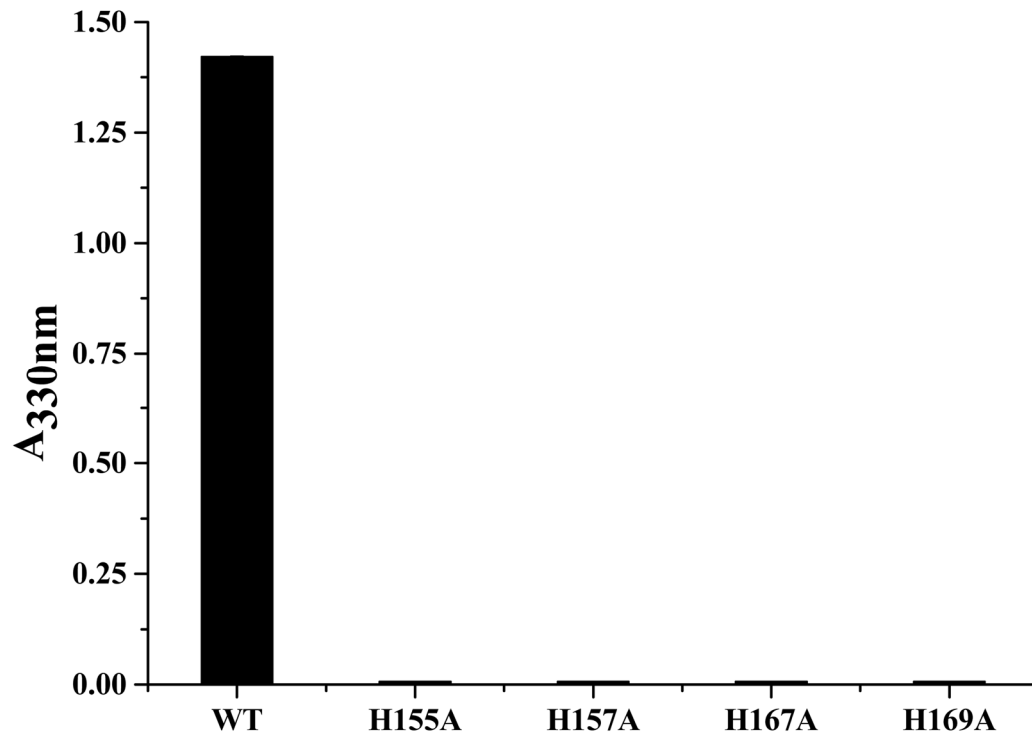

24

25

26 **Fig. S1. Enzyme assay for the four mutant proteins.** All mixtures of the purified proteins and  
27 substrates were incubated at 30°C. Control, wild type protein; H155A, H157A, H167A, and  
28 H169A mutant proteins. Reaction consisted of 1  $\mu$ l wild type or mutant protein in the reaction  
29 mixture (1 ml total volume, containing 0.46 mM gentisate in 0.1 M phosphate buffer, pH 7.4).

30

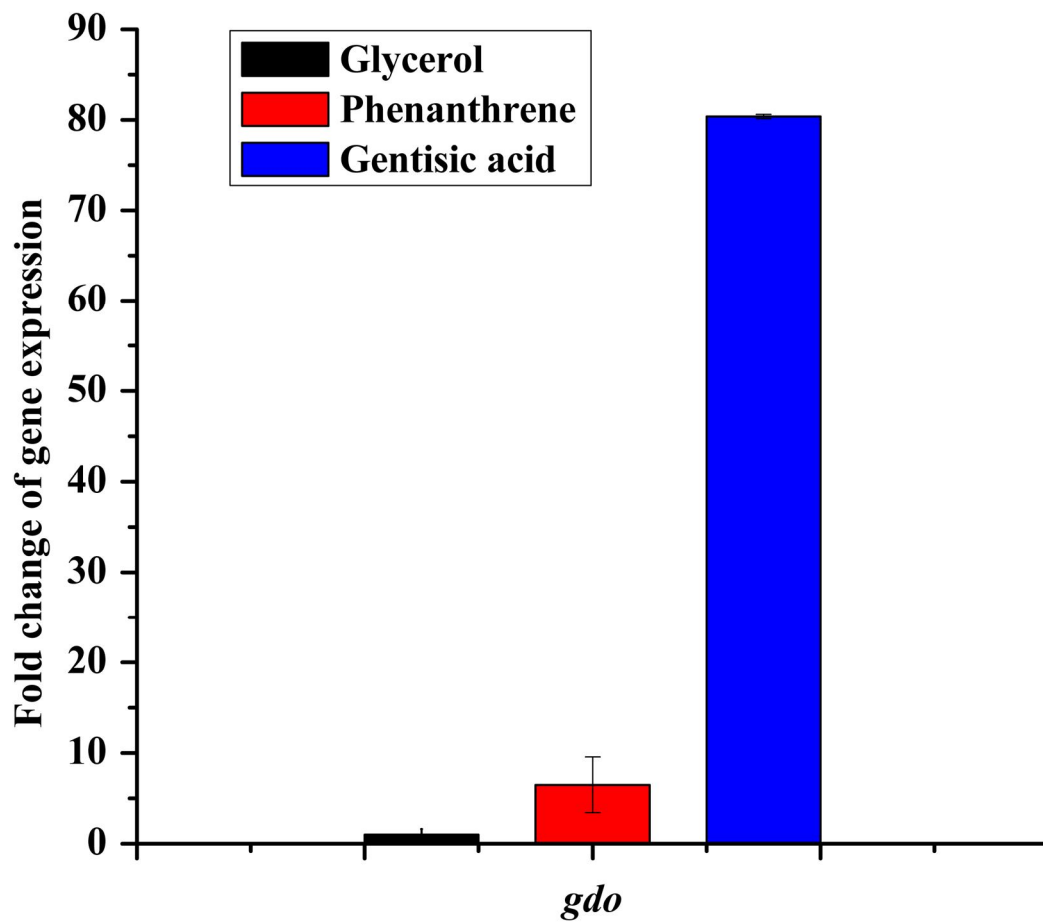

32

33

34 **Fig. S2. RT-qPCR analysis of the expression level of gene *gdo*.** The plot shows expression

35 level of gene *gdo* in different medium: black, glycerol medium; red, phenanthrene medium;

36 blue, gentisic acid medium. Bars show the average error.
